# Supplementary material
Source: publisher site journal article supplement (https://www.dovepress.com/article/313311)
Supplement: Supplementary file 1 [file get_supplementary_file.php]

**Appendix 1. Hospital preparedness assessment tool for mass casualty incident and disaster (advanced level hospital)**

**Thai Hospital Assessment and Evaluation Tool for Mass Casualty Incident and Disaster Preparedness**

The survey is divided into four sections: basic information, preparation, suggestions, and hospital capacity.

**Part I Basic Information**

| **Basic information** | **Evaluation** | | | | | |
| --- | --- | --- | --- | --- | --- | --- |
| 1. Location of hospital (region/district) | Middle  District…………. | Northern  District………..… | Southern  District........…… | Eastern  District……… | Western  District………... | North Eastern  District….. |
| 2. Hospital capability | F | M | S | A (U) |  |  |
| 3. Number of patients receiving emergency services/year | <25,000 | 25,000‒  50,000 | 50,001‒  75,000 | 75,001‒  100,000 | >100,000 |  |
| 4. Number in the workforce |  | | | | | |
| 4.1 Medical team | Doctor  ........…. | Nurse  ........ | EMT  .......... | Pharmacist ........ | Other  ….…..…. |  |
| 4.2 Supporting team | Engineer  ……….… | Nutritionist | Dressing …… | Security /Traffic …..… | Finance ….. | Information ………... |
| 5. Hospital agency | Ministry of Public Health | Ministry of Education | Military/ Police | Local admin*/ foundation | Private | Other  ……………….….... |
| 6. HA, JCI Accreditation | Accredited | Under document review | Reaccredited | No accreditation |  |  |
| 7. Reserve capability  (within 12 hours) | Yes | No | Don’t know |  |  |  |
| 8. Trauma center level | 1 | 2 | 3 | 4 |  |  |
| 9. Capability to care for burn patients (S, A) | Yes | None |  |  |  |  |

*Local Admin = Local Administrative office

Trauma center levels in Thailand:

1: Comprehensive/advance tertiary care capability, regional and referral trauma center

2: Definitive care capability, but not included advanced-surgical critical care, cardiac and great vessel injury capabilities

3: Resuscitation and emergency care capability

4: Basic trauma care capability provided by general practitioner

**Part 2 Preparedness checklist**

| **Preparedness elements** | **Evaluation** | | | |
| --- | --- | --- | --- | --- |
| *If the answer is ‘No’, please fill in a suggestion* | | | *Recommendation* |
| **1. Governance** |  | | | |
| - 1. Mass casualty incident committee | Yes  Name…………..…..….… | Not known | No |  |
| 1.2 Mass Casualty Incident or Emergency Management (S, A) | Yes  Name.…….……..… | Not known | No |  |
| 1.3 Official policy and strategy | Yes | Not known | No |  |
| 1.4 Risk factor analysis and prioritization | Yes  1.…....2.…….  3….….4……5….... | Not known | No |  |
| 1.5 Mass Casualty Incident Planning |  | | | |
| 1.5.1 Mass casualty incident plan of the hospital | Yes  Year..… | Not known | No |  |
| 1.5.2 Level of plan (eg, 1, 2, 3) | Yes.....Level  (eg, standby, partial activation, full activation) | Not known | No |  |
| 1.5.3 Sub-plan according to HVA |  | | | |
| 1.5.3.1 Mass casualty incident | Yes | Not known | No |  |
| 1.5.3.2 Chemical substance incident (S, A) | Yes | Not known | No |  |
| 1.5.3.3 Epidemics | Yes | Not known | No |  |
| 1.5.3.4 Radioactive substance incident(A) | Yes | Not known | No |  |
| 1.5.3.5 Fire | Yes | Not known | No |  |
| 1.5.3.6 Computer failure | Yes | Not known | No |  |
| 1.5.3.7 Flood | Yes | Not known | No |  |
| 1.5.3.8 Earthquake | Yes | Not known | No |  |
| 1.5.3.9 Terrorists/bombing | Yes | Not known | No |  |
| 1.5.3.10 Emergency room malfunction | Yes | Not known | No |  |
| 1.5.4 Plans with external organization | Yes  Year …... | Not known | No |  |
| 1.5.5 Evacuation/Relocation planning for patients/ staff | Yes | Not known | No |  |
| 1.5.6 Recovery plan | Yes | Not known | No |  |
| 1.6 MCI or Disaster exercise |  | | | |
| 1.6.1 Theory exercise | Yes.......time/year | Not known | No | Twice a year |
| 1.6.2 Simulation exercise | Yes…...time/year | Not known | No | Once a year |
| 1.6.3 Exercise with external organizations | Yes……time/year | Not known | No |  |
| 1.6.4 Evaluation/After action review | Yes | Not known | No |  |
| 1.7 Management system (HICS) | Yes | Not known | No |  |
| **Preparedness** | **Evaluation** | | | |
| **2. Financing** |  | | | |
| 2.1 Budget management |  | | | |
| 2.1.1 Victims medical fees | Yes | Not known | No |  |
| 2.1.2 Aiding team (S, A) | Yes | Not known | No |  |
| 2.1.3 Donation | Yes | Not known | No |  |
| 2.1.4 Medical products reimbursement | Yes | Not known |  |  |
| 2.2 Training |  | | | |
| 2.2.1 Incident command system | Yes ..../ year  .......% per staff | Not known | No | ≥50% of the management team |
| 2.2.2 Mass Casualty Incident and Disaster management (S, A) | Yes …. /year  .......% per staff | Not known | No |  |
| 2.3 Exercise/Drill preparation | Yes | Not known | No |  |
| 2.4 Community education | Yes | Not known | No |  |
| 2.5 Recovery budget management | Yes | Not known | No |  |
| 2.6 Compensation from injury from the operation for healthcare provider | Yes | Not known | No |  |
| 2.7 Staff operation cost | Yes | Not known | No |  |
|  | | | | |
| **3. Health workforce** |  | | | |
| 3.1 Hospital teams |  | | | |
| 3.1.1 Emergency management team | Yes | Not known | No |  |
| 3.1.2 Patient care team | Yes | Not known | No |  |
| 3.1.3 Coordinator (internal & external) | Yes | Not known | No |  |
| 3.1.4 Supporting team (electricity, water, gas, etc) | Yes | Not known | No |  |
| 3.1.5 Emergency management expert (S, A) | Yes | Not known | No |  |
| 3.1.6 Special teams |  | | | |
| 3.1.6.1 Chemical (HazMat) substances | Yes | Not known | No |  |
| 3.1.6.2 Epidemics | Yes | Not known | No |  |
| 3.1.6.3 Radioactive substances (A) | Yes | Not known | No |  |
| 3.1.7 Operation evaluation team | Yes | Not known | No |  |
| 3.1.8 Data recording team | Yes | Not known | No |  |
| 3.1.9 Security team | Yes | Not known | No |  |
| 3.1.10 Translator (S, A) | Yes | Not known | No |  |
| 3.1.11 Sign language team (S, A) | Yes | Not known | No |  |
| 3.2 Assissting emergency responding team (S, A) | Yes ..Team | Not known | No |  |
| **Preparedness** | **Evaluation** | | | |
| **4. Information system** |  | | | |
| 4.1 Hospital capability | Yes (fill in appendix) | Not known |  |  |
| 4.2 Staff callback system | Yes | Not known | No |  |
| 4.3 Guideline (Patient care or management) | Yes | Not known | No |  |
| 4.4 Victim data collection | Yes | Not known | No |  |
| 4.5 Emergency alert system | Yes | Not known | No |  |
| 4.6 Hospital map | Yes | Not known | No |  |
| 4.7 Disaster incidents data within 5 years | Yes …….…times | Not known | No |  |
| 4.8 Staff contact list | Yes | Not known | No |  |
| 4.9 Internal informing and communication protocol | Yes | Not known | No |  |
| 4.10 Internal departments information and contacts | Yes | Not known | No |  |
| 4.11 External organization and contacts | Yes | Not known | No |  |
| 4.12 Staff roles/responsibility | Yes | Not known | No |  |
| 4.13 Communication/Public relation plan (internal, external, relatives, reporters, etc.) | Yes | Not known | No |  |
| 4.14 Hospital infrastructure data | Yes | Not known | No |  |
| 4.15 Reserved location for providing treatments | Yes | Not known | No |  |
| 4.16 Manual data backup system (S, A) | Yes | Not known | No |  |
| 4.17 Communication for vulnerability personnel | Yes | Not known | No |  |
|  | | | | |
| **5. Medical products and technology** |  | | | |
| 5.1 Logistics planning | Yes | Not known | No |  |
| 5.2 Stockpile |  | | | |
| 5.2.1 Medicines | Yes……day | Not known | No |  |
| 5.2.2 Blood (M, S, A) | Yes…..…unit | Not known | No |  |
| 5.2.3 Vaccines (TT, TAT, Measles) | Yes..people | Not known | No |  |
| 5.2.4 Antidotes (S, A) * | Yes | Not known | No |  |
| 5.2.5 Personal protective equipment | Yes | Not known | No |  |
| 5.2.6 Portable x-rays machines (M, S, A) | Yes …machines | Not known | No |  |
| 5.2.7 Portable Ultrasound machine | Yes…machines | Not known | No |  |
| 5.2.8 Respirators | Yes machines | Not known | No |  |
| 5.3 Preset equipment/laboratory | Yes | Not known | No |  |
| 5.4 Food and Nutrition | Yes….people ………... day | Not known | No |  |
| 5.5 Emergency operation center Commanding (EOC) | Yes | Not known | No |  |
| 5.6 Communication center | Yes | Not known | No |  |
| 5.7 Materials for evidence investigation and inspection | Yes | Not known | No |  |
| 5.8 Public relation center | Yes | Not known | No |  |
| 5.9 Oil reservation | Yes........day | Not known | No | (4 days) |
| 5.10 Electricity generator and reserved electricity | Yes .......day | Not known | No | (4 days) |
| 5.11 Water reservation system | Yes .........day | Not known | No | (4 days) |
| 5.12 Gas reservation system | Yes .......day | Not known | No | (4 days) |
| 5.13 Sterilization system | Yes | Not known | No |  |
| 5.14 Field hospital installation (S, A) | Yes | Not known | No |  |
| 5.15 Location and specific equipments |  | | | |
| 5.15.1 Chemical cleansing room (S, A) * | Yes Stretcher……people Ambulatory…...people | Not known | No |  |
| 5.15.2 Negative pressure room (S, A) | Yes | Not known | No |  |
| 5.15.3 Radiation exposure quarantine (A) | Yes | Not known | No |  |
| 5.16 Chemical protection uniform (S*, A) | Yes  Level ..C......, B ...... A ...... | Not known | No | At least level C |
| 5.17 Waste management | Yes | Not known | No |  |
| 5.18 Medical equipment for children and infants (S, A) | Yes (fill in appendix) | Not known | No |  |
| 5.19 Communication device for disabled (eye, ears) (S, A) | Yes | Not known | No |  |
| 5.20 Multi-language communication manual | Yes | Not known | No |  |
|  |  | | | |
| **6. Service delivery** |  | | | |
| 6.1 Planned announcement protocol | Yes | Not known | No |  |
| 6.2 Planned cancellation protocol | Yes | Not known | No |  |
| 6.3 Disaster triage |  | | | |
| 6.3.1 Adult | Yes  Specify...... | Not known | No |  |
| 6.3.2 Children | Yes  Specify....... | Not known | No |  |
| 6.4 Zoning | Yes | Not known | No |  |
| 6.5 Cancellation of non-emergency surgery protocol (S, A) | Yes | Not known | No |  |
| 6.6 Evaluation and monitoring of hospital damage and need assessment | Yes | Not known | No |  |
| 6.7 Safety and asset managment | Yes | Not known | No |  |
| 6.8 Rehabilitation (S, A) | Yes | Not known | No |  |
| 6.9 Dead body management and reserved location | Yes | Not known | No |  |
| 6.10 Forensic investigation (S, A) | Yes | Not known | No |  |
| 6.11 Volunteer management | Yes | Not known | No |  |
| 6.12 Temporary shelter | Yes | Not known | No |  |
| 6.13 Medical records/follow-up | Yes | Not known | No |  |
| 6.14 Internal coordination procedure | Yes | Not known | No |  |
| 6.15 External coordination procedure | Yes | Not known | No |  |
| 6.16 Emergency medical services | Yes  level … teams .… | Not known | No |  |
| 6.17 Psychological care (S, A) | Yes | Not known | No |  |
| 6.18 Public relation | Yes | Not known | No |  |
| 6.19 Evacuation | Yes | Not known | No |  |
| 6.20 Hemodialysis | Yes | Not known | No |  |
| 6.21 Recovery | Yes | Not known | No |  |
| 6.22 Victims follow up protocol | Yes | Not known | No |  |
| 6.23 Operation evaluation | Yes | Not known | No |  |
| 6.24 Health and disease prevention education | Yes | Not known | No |  |
|  |  | | | |
| **7. Participation** |  | | | |
| 7.1 Coordination and operation guideline for requesting assistance | Yes | Not known | No |  |
| 7.2 Training with external agencies | Yes …… per/year | Not known | No |  |
| 7.3 Memorandum of Cooperation with  external agencies | Yes | Not known | No |  |
| 7.4 Coordination with the manufacturer/distributor/supplier | Yes | Not known | No |  |
| 7.5 Cooperation with the legal department or police. | Yes | Not known | No |  |
| 7.6 Coordination within the Department of Public Health. | Yes | Not known | No |  |
| 7.7 Coordination outside the Department of Public Health | Yes | Not known | No |  |

**Part 3 Suggestions**

3.1 Governance/Leadership

………………………………………………………………………………………………

……………………………………………………………………………………………

3.2 Financing

................................................................................................................................................

................................................................................................................................................

3.3 Health workforce

................................................................................................................................................

................................................................................................................................................

3.4 Information System

................................................................................................................................................

................................................................................................................................................

3.5 Medical products and technologies

................................................................................................................................................

................................................................................................................................................

3.6 Service delivery

................................................................................................................................................

................................................................................................................................................

3.7 Participation (Cooperation with external agencies)

................................................................................................................................................

................................................................................................................................................

................................................. ........../........./...............

Evaluator Date of Evaluation

**Appendix 1**

Information on general capability and reserved capability of the hospital

|  | Normal Capacity  (Bed) | Reserved capacity  (within 12 hours) | Vital signs monitoring device | Ventilators | Negative Pressure Room |
| --- | --- | --- | --- | --- | --- |
| Hospital |  |  |  |  |  |
| Emergency room capacity | Red .…  Yellow ...  Green ….  Black ... | Red .…  Yellow ...  Green ….  Black .... |  |  |  |
| Observation room(S, A) |  |  |  |  |  |
| Trauma ward (S, A) |  |  |  |  |  |
| Surgical ward (M, S, A) |  |  |  |  |  |
| Orthoperdict ward (S, A) |  |  |  |  |  |
| Medicine ward (M, S, A) |  |  |  |  |  |
| Ob-Gyn ward (M, S, A) |  |  |  |  |  |
| Delivery room |  |  |  |  |  |
| Pediatric ward (S, A) |  |  |  |  |  |
| Newborn ward (S, A) |  |  |  |  |  |
| Psychiatric ward (A) |  |  |  |  |  |
| Surgical ICU (S, A) |  |  |  |  |  |
| Medical ICU (S, A) |  |  |  |  |  |
| PICU (S, A) |  |  |  |  |  |
| NICU (A) |  |  |  |  |  |
| Burnt unit/ward (A) |  |  |  |  |  |
| Operating room (M, S, A) |  |  |  |  |  |
| Hemodialysis (M, S, A) |  |  |  |  |  |
| Medical equipment center (if available) |  |  |  |  |  |

Ob-Gyn = Obstetrics and Gynecology ICU = Intensive care unit

PICU = Pediatric intensive care unit NICU = Neonatal intensive care unit

* Adapted from Disaster management preparation and responsiveness assessment for hospitals National Institutes of Emergency Medicines and Hospital Disaster Preparedness Self-Assessment Tool, American College of Emergency Physician
